FP799

**KIDNEY TRANSPLANTATION FROM ELDERLY DONORS AFTER CONTROLLED CIRCULATORY DEATH HAVE SIMILAR OUTCOMES COMPARED TO THOSE FROM ELDERLY DECEASED DONORS**

Anna Buxeda<sup>1</sup>, Carlos Arias-Cabrales<sup>1</sup>, María José Pérez-Sáez<sup>1</sup>, Gonzalo Velis<sup>1</sup>, Dolores Redondo-Pachón<sup>1</sup>, Ana Zapatero<sup>1</sup>, Marisa Mir<sup>1</sup>, Marta Crespo<sup>1</sup>, Julio Pascual<sup>1</sup>

<sup>1</sup>Hospital del Mar, Barcelona, Spain

**INTRODUCTION:** During the past decade, the number of donors after circulatory death (DCD) has increased exponentially in Spain. However, there are concerns about medium and long-term outcomes of elderly DCD kidney transplants (KT). We aimed to compare graft outcomes from elderly DCD-KT with young DCD-KT and KT from elderly donors after brain death (DBD).

**METHODS:** We analyzed 85 DCD-KT and 101 KT from ≥65 years-old (y) DBD-KT from January 2013 to December 2017. Median follow-up was 9 months [IQR 4.6-29.6 months] for DCD-KT and 20 months [IQR 7.7-38.28] for ≥65y-DBD-KT.

**RESULTS:** ≥65y-DCD-KT represented the 53% of our DCD cohort, and 64.4% of these grafts were transplanted to ≥65y recipients. ≥65y-DCD-KT had more delayed graft function (DGF) compared to <65y-DCD-KT (43.2% vs 17.9%, p=0.013), but similar to ≥65y-DBD-KT (38.3%; p=0.585). One-month renal function was worst compared to both groups (creatinine= 2.71, 1.89 and 2.11 mg/dl, respectively, p=0.003 and 0.05), but renal function at 6 months was similar (creatinine= 1.92, 1.53 and 1.93mg/dl; p=0.055 and 0.934). There were no differences in primary non-function or vascular graft-loss between groups. Table 1A. Donor age was the only determinant of DGF (HR 1.126 [1.025-1.236; p=0.013]. Table 1B.

|                                         | <65y DCD (n=40) | ≥65y DCD (n=44)  | ≥65y DBD (n=101)   | p value* | p value** |
|-----------------------------------------|-----------------|------------------|--------------------|----------|-----------|
| <b>Recipient</b>                        |                 |                  |                    |          |           |
| HD as RRT before KT (n, %)              | 52 (62 ± 10.6)  | 66 (11 ± 6.5)    | 69 (74 ± 6.8)      | <0.001   | 0.003     |
| Male gender (n, %)                      | 22 (56.4)       | 33 (77.3)        | 40 (59.4)          | 0.104    | 0.106     |
| HD as RRT before KT (n, %)              | 28 (71.8)       | 38 (86.4)        | 84 (83)            | 0.103    | 0.628     |
| Time in RRT (months, median [IQR])      | 21 [12.6-48]    | 23 [15.25-41.40] | 20.5 [10.85-33.88] | 0.638    | 0.189     |
| <b>Donor / KT</b>                       |                 |                  |                    |          |           |
| ECD (n, %)                              | 11 (28.2)       | 45 (100)         | 101 (100)          | <0.001   | n.a.      |
| KDPI (mean ± SD)                        | 62.65 ± 18.31   | 96.87 ± 3.08     | 97.69 ± 4.02       | <0.001   | 0.374     |
| Cold ischemia time (hours, mean ± SD)   | 11.27 ± 6.63    | 10.32 ± 6.28     | 16.86 ± 5.02       | 0.512    | <0.001    |
| <b>Immunosuppression</b>                |                 |                  |                    |          |           |
| Thymoglobulin induction (n, %)          | 7 (17.5)        | 4 (9.5)          | 15 (14.85)         | 0.220    | 0.323     |
| mTORi (n, %)                            | 13 (32.5)       | 13 (29.7)        | 23 (22.88)         | 0.309    | <0.001    |
| <b>Outcomes</b>                         |                 |                  |                    |          |           |
| DGF (n, %)                              | 7 (17.5)        | 19 (43.2)        | 36 (38.3)          | 0.013    | 0.585     |
| Days until Cr descent (days, mean ± SD) | 7.5 ± 9.27      | 8.85 ± 8.03      | 8.08 ± 8.12        | 0.499    | 0.623     |
| 3 month Cr (mg/dl, mean ± SD)           | 1.89 ± 1.09     | 2.71 ± 1.45      | 2.11 ± 1.02        | 0.013    | 0.05      |
| 6 months Cr (mg/dl, mean ± SD)          | 1.33 ± 0.42     | 1.53 ± 0.77      | 1.93 ± 0.77        | 0.055    | 0.934     |
| Vascular graft-loss (n, %)              | 2 (5.1)         | 3 (6.7)          | 12 (11.88)         | 0.766    | 0.318     |
| Primary non-function (n, %)             | 1 (2.6)         | 0 (0)            | 4 (3.96)           | 0.280    | 0.176     |

HD, hemodialysis; RRT, renal replacement therapy; KT, kidney transplantation; IQR, interquartile range; ECD, expanded criteria donor; KDPI, kidney donor profile index; SD, standard deviation; mTORi, mammalian target of rapamycin inhibitor; DGF, delayed graft function; Cr, creatinine.

\* p value = <65y-DCD vs ≥65y-DCD  
 \*\* p value = ≥65y-DCD vs ≥65y-DBD  
 n.a. = not applicable

Table 1B.

|                            | DGF                 |                  |         |                       |                 |         |
|----------------------------|---------------------|------------------|---------|-----------------------|-----------------|---------|
|                            | Univariate analysis |                  |         | Multivariate analysis |                 |         |
|                            | HR                  | CI               | p value | HR                    | CI              | p value |
| Recipient age (years)      | 1.064               | [1.011 - 1.120]  | 0.017   |                       |                 |         |
| Donor age (years)          | 1.060               | [1.013 - 1.109]  | 0.013   | 1.126                 | [1.025 - 1.236] | 0.013   |
| Diabetes Mellitus          | 1.240               | [0.496 - 3.259]  | 0.659   |                       |                 |         |
| Hypertension               | 0.962               | [0.165 - 5.606]  | 0.965   |                       |                 |         |
| Ischemic cardiopathy       | 1.270               | [0.496 - 3.259]  | 0.616   |                       |                 |         |
| Time in RRT (years)        | 1.009               | [0.994 - 1.025]  | 0.254   |                       |                 |         |
| HD as RRT before KT        | 2.667               | [0.695 - 10.225] | 0.156   |                       |                 |         |
| Previous KT                | 2.364               | [0.621 - 8.991]  | 0.201   |                       |                 |         |
| KDPI                       | 1.042               | [0.999 - 1.086]  | 0.057   |                       |                 |         |
| HLA mismatch               | 1.034               | [0.642 - 1.685]  | 0.891   |                       |                 |         |
| Pre-KT DSA                 | 2.429               | [0.607 - 9.722]  | 0.210   |                       |                 |         |
| Peak PRA >30%              | 5.278               | [1.096 - 25.410] | 0.038   |                       |                 |         |
| Cold ischemia time (hours) | 0.975               | [0.903 - 1.053]  | 0.515   |                       |                 |         |
| mTORi                      | 0.484               | [0.05 - 4.793]   | 0.539   |                       |                 |         |
| Thymoglobulin induction    | 4.637               | [1.224 - 17.566] | 0.024   |                       |                 |         |

\* Excluded recipient age by collinearity

RRT, renal replacement therapy; HD, hemodialysis; KT, kidney transplantation; KDPI, kidney donor profile index; DSA, donor specific antibody; PRA, panel reactive antibodies; mTORi, mammalian target of rapamycin inhibitor.

**CONCLUSIONS:**  $\geq 65$ y-DCD-KT have more DGF compared to  $< 65$ y-DCD-KT but similar to  $\geq 65$ y-DBD-KT. Renal function at 6 months was similar between the three groups. However, additional studies are needed to assess long-term outcomes. The only determinant of DGF among DCD groups was donor age.
